# Supplementary material for: Overweight and obesity by school socioeconomic composition and adolescent socioeconomic status: a school-based study
Source: PubMed Central journal article supplement (PMC8507235; doi:10.1186/s12889-021-11752-2), 2021-10-11
Supplement: 12889_2021_11752_MOESM2_ESM.pdf [file 12889_2021_11752_MOESM2_ESM.pdf]

## Questionnaire

### Adolescent students' physical and sport activity

The goal of this survey is to inform us about your **physical and sports activities**. In answering this survey **spontaneously** and **sincerely**, you will bring precious informations to researchers at the Faculty of Sports Sciences, Marseille. Your answer will be **anonymous** and used only for **scientific purposes**. No commercial use is warranted.

We thank you for your participation.

1. Age       2. Height       3. Weight       4. Number of Siblings
5. Sex      Female       Male       6. School Board      Full board       ½ board       No board
7. You live with      your parents       your father       your mother       alternating       other(s)
8. Father's and Mother's Occupation (*tick the correct answer(s)*)

|                                                            | Mother | Father |
|------------------------------------------------------------|--------|--------|
| Farmer                                                     |        |        |
| Merchant, artisan, company director                        |        |        |
| Intellectual occupation (engineer, doctor/physician, etc.) |        |        |
| Intermediate occupation (teacher, nurse, technician, etc.) |        |        |
| Salaried employee                                          |        |        |
| Manual worker                                              |        |        |
| Retired                                                    |        |        |
| Unemployed                                                 |        |        |
| At home                                                    |        |        |
| Other (precise) .....                                      |        |        |

7. In a typical week, on how many days do you bicycle for at least 10 minutes continuously to get to and from places?

8. How much time do you spend bicycling for travel on a typical day?       Hours       Minutes

9. Apart from physical education classes at school, do you do sports? (*If not, the questionnaire ends there*)  
Yes       No

7. In a typical week, on how many days do you do sports ?

8. In a typical week, how much time do you spend doing sports ?       Hours       Minutes

9. What sport do you do the most (main sport) ? (*Only one answer*)

10. You play your main sport... (*multiple answers possible*)       club       outside-club

11. How long have you been playing your main sport ?       year(s)      and       month(s)

12. What is your level of competition in your main sport ?

|                                                                   |  |
|-------------------------------------------------------------------|--|
| I do not play in competition                                      |  |
| Local/community level                                             |  |
| Regional/state level                                              |  |
| National level                                                    |  |
| International level                                               |  |
| Official high-level athletes recognized by the Ministry of Sports |  |

13. In a typical week, on how many days do you do your main sport ?

14. In a typical week, how much time do you spend doing your main sport ?       Hours       Minutes
